# Supplementary material for: Synthesis of calixresorcarenes using magnetic poly triazine-benzene sulfonamide-SO3H
Source: Royal Society of Chemistry journal article supplement (doi:10.1039/d1ra07393a), 2021-01-01

## Supplementary Information

### Synthesis of calixresorcarenes using magnetic poly triazine-benzene sulfonamide-SO<sub>3</sub>H

Alireza Gharekhani, Ramin Ghorbani-vaghei,\* Sedigheh Alavinia  
Department of Organic Chemistry, Faculty of Chemistry, Bu-Ali Sina University, 65178/38695, Hamedan, Iran.  
E-mail: [rgvaghei@yahoo.com](mailto:rgvaghei@yahoo.com) or [ghorbani@basu.ac.ir](mailto:ghorbani@basu.ac.ir)

**2,8,14,20-Tetraphenyl-4,6,10,12,16,18,22,24-octahydroxycalix[4]-resorcarene (3a)**

Colorless solid, mp > 300 °C (dec); FT-IR (KBr)  $\nu$ : 3406, 3030, 2929  $\text{cm}^{-1}$ ;  $^1\text{H}$  NMR (500 MHz,  $\text{DMSO-}d_6$ )  $\delta$  ppm: 5.55 (s, 1H, CH,  $\text{H}_4$ ), 6.13 (s, 1H, Ar-H,  $\text{H}_1$ ), 6.20 (s, 1H, Ar-H,  $\text{H}_3$ ), 6.75-6.96 (m, 5H, Ar-H,  $\text{H}_5, \text{H}_6, \text{H}_7$ ), 8.53-8.94 (OH, broad peak,  $\text{H}_2$ , 3H), ppm.  $^{13}\text{C}$  NMR (125 MHz,  $\text{DMSO-}d_6$ )  $\delta$  ppm: 50.03, 106.94, 121.44, 127.44, 127.47, 129.03, 130.16, 144.54, 159.12. MS:  $m/z = 702$  [ $\text{M}^+$ ].

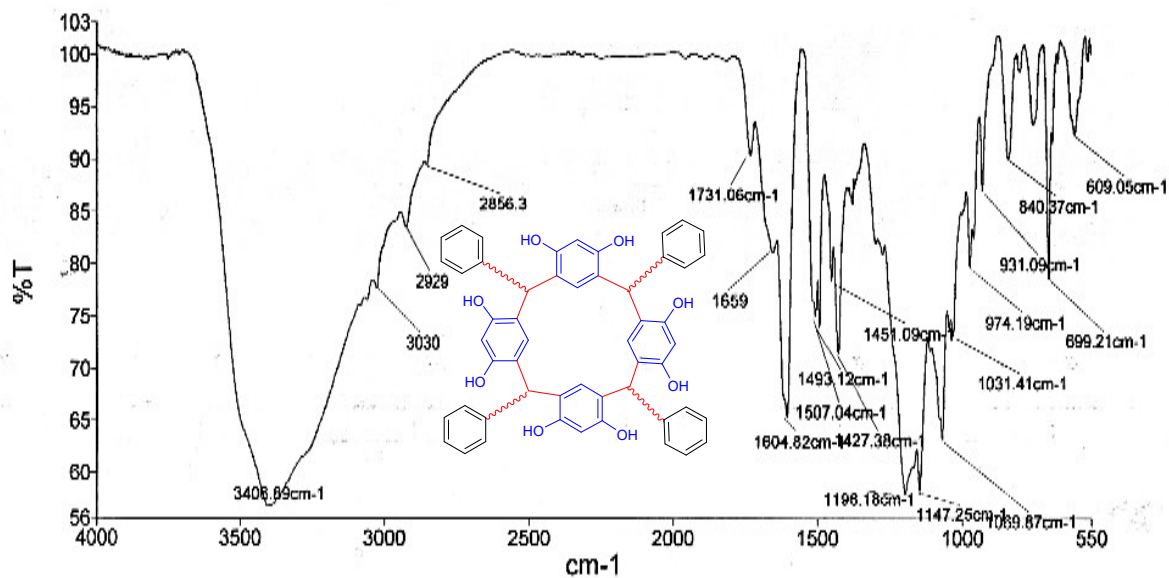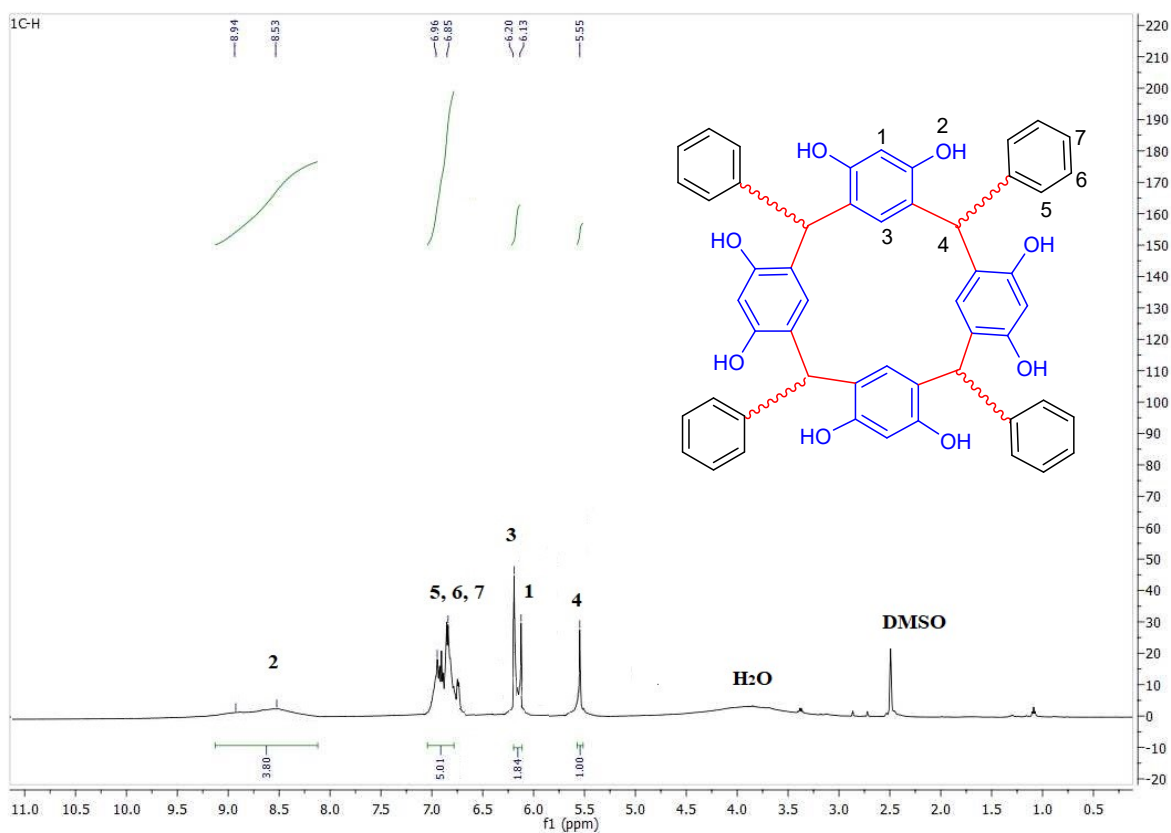

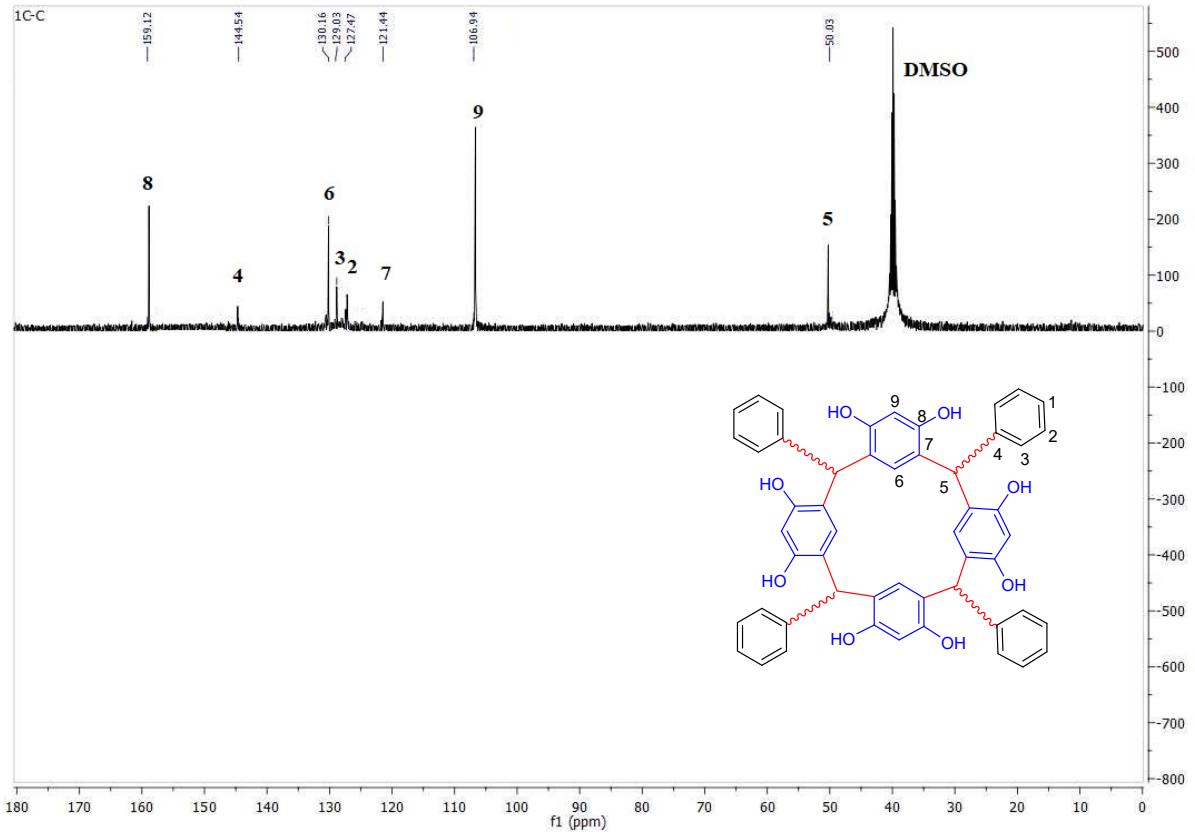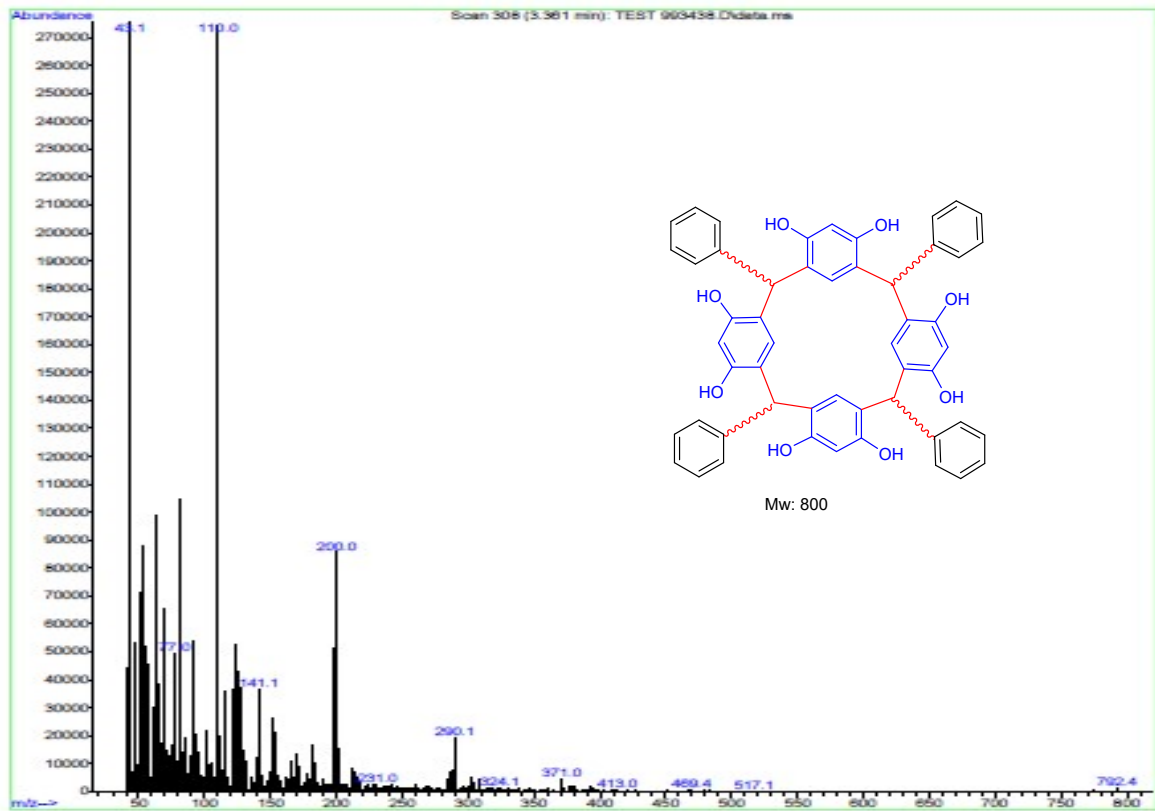

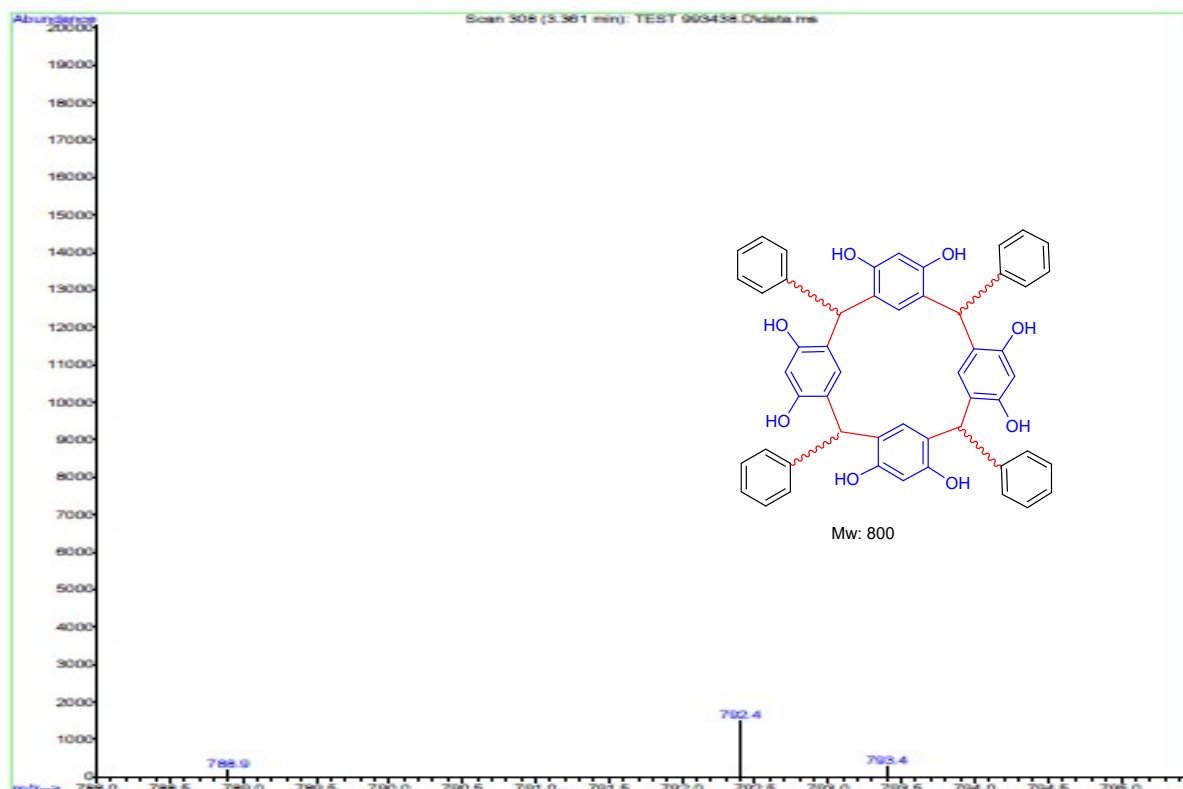

**2,8,14,20-Tetra-*p*-tolyl-4,6,10,12,16,18,22,24-octahydroxycalix[4]-resorcarene (3b)**

Reddish orange solid, mp > 300 °C (dec); FT-IR (KBr)  $\nu$ : 3353, 3137, 2919  $\text{cm}^{-1}$ ;  $^1\text{H}$  NMR (500 MHz,  $\text{DMSO-}d_6$ )  $\delta$  ppm: 2.21 (s, 3H,  $\text{H}_7$ ), 5.57 (s, 1H, CH,  $\text{H}_4$ ), 6.09 (s, 1H, Ar-H,  $\text{H}_2$ ), 6.16 (s, 1H, Ar-H,  $\text{H}_3$ ), 6.37-6.97 (m, 4H, Ar-H,  $\text{H}_5$ ,  $\text{H}_6$ , 4H), 7.96-9.12 (OH, broad peak,  $\text{H}_1$ , 2H), ppm.  $^{13}\text{C}$  NMR (125 MHz,  $\text{DMSO-}d_6$ )  $\delta$  ppm: 20.04, 55.75, 106.54, 121.05, 127.75, 128.86, 133.20, 143.91, 153.29. MS:  $m/z$  = 856 [M+].

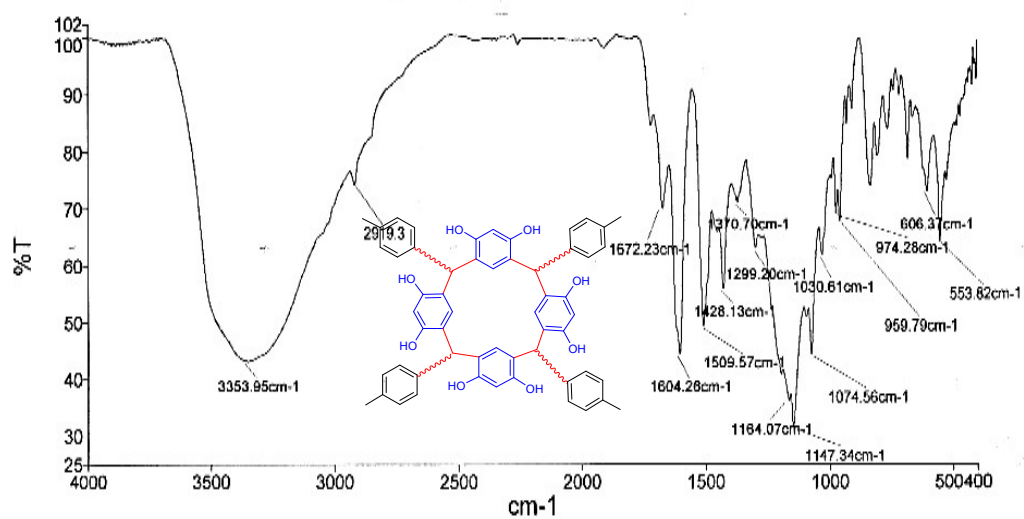

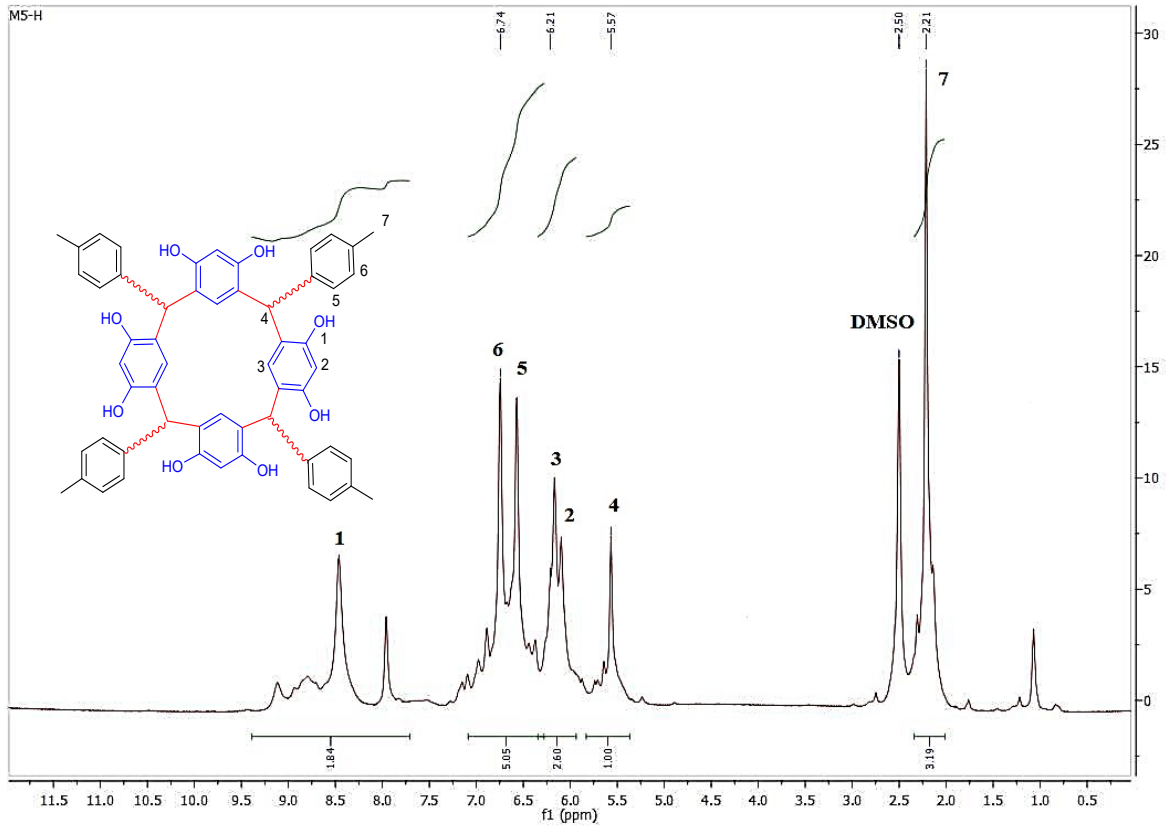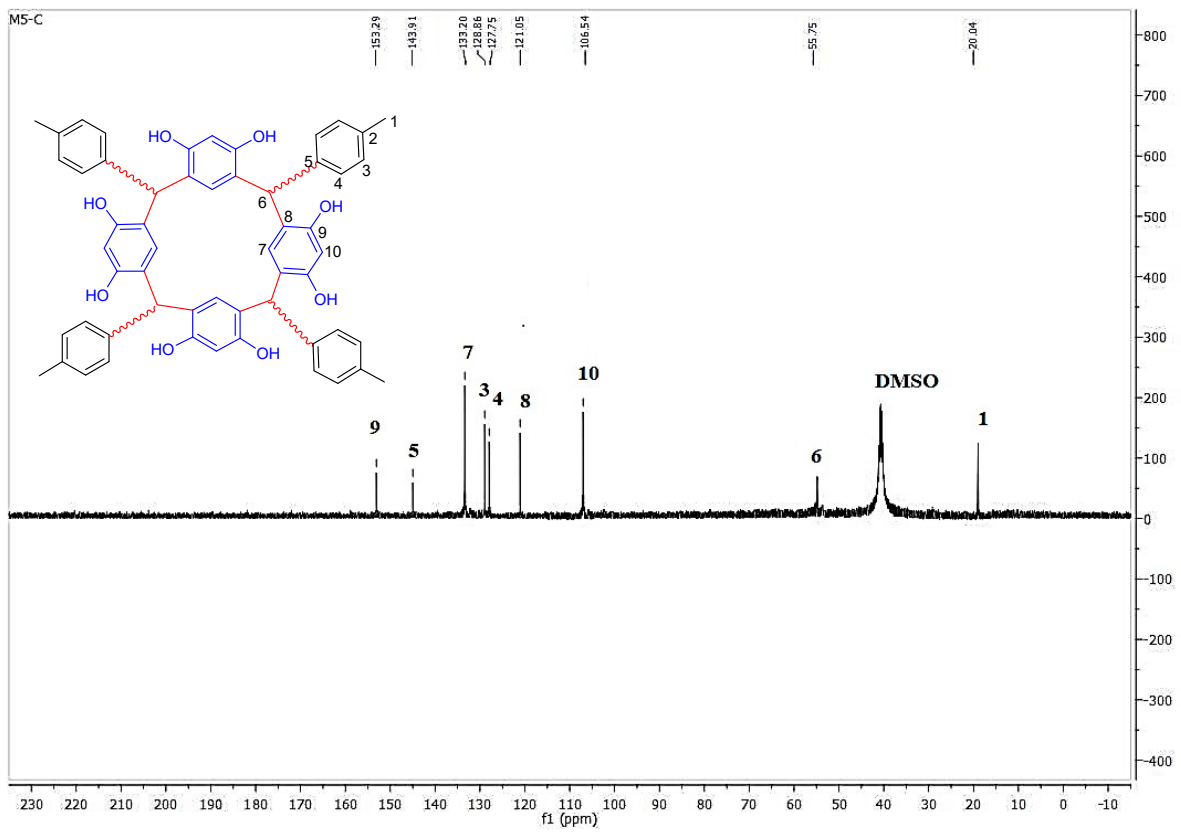

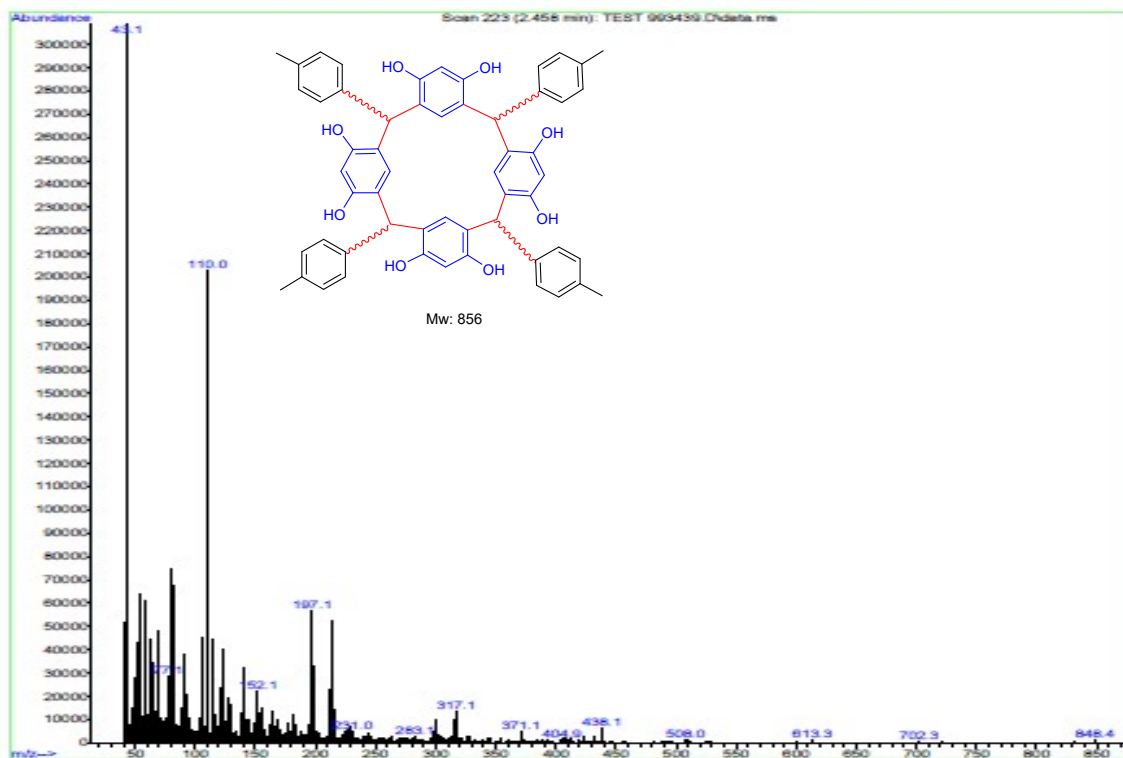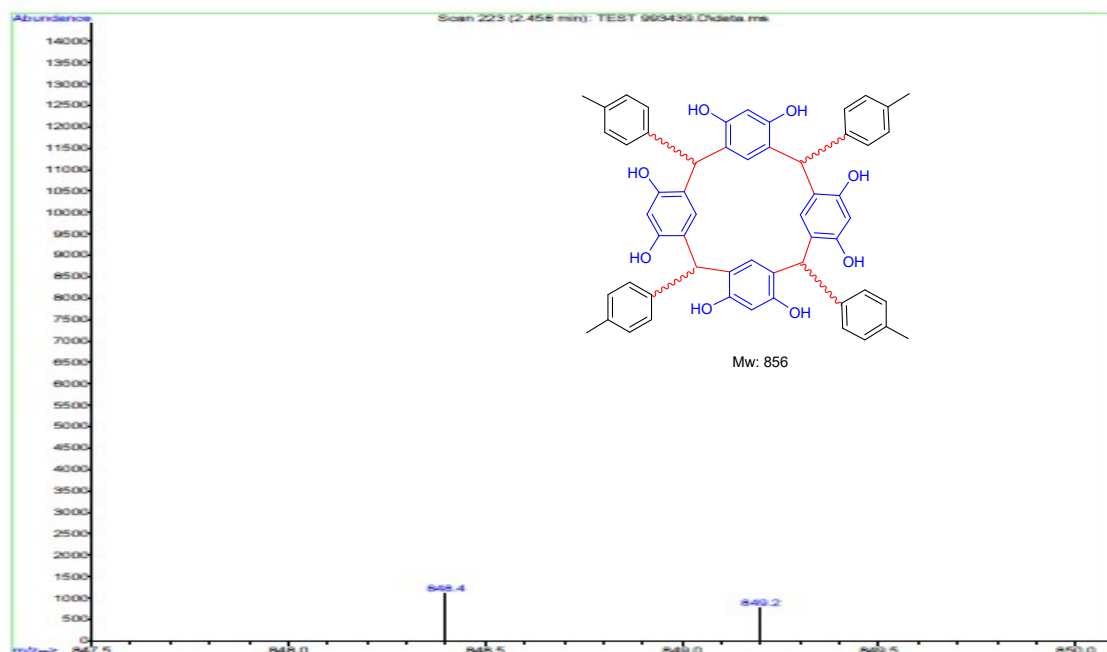

**2,8,14,20-Tetra-*p*-methoxyphenyl-4,6,10,12,16,18,22,24-octahydroxycalix[4]-resorcarene (3c)**

Reddish orange solid, mp > 300 °C (dec); FT-IR (KBr)  $\nu$ : 3553, 3397, 2971  $\text{cm}^{-1}$ ;  $^1\text{H}$  NMR (300 MHz,  $\text{DMSO-}d_6$ )  $\delta$  ppm: 3.71 (s, 3H,  $\text{CH}_3$  H<sub>7</sub>), 5.56 (s, 1H, CH, H<sub>4</sub>), 6.16 (s, 1H, Ar-H, H<sub>2</sub>), 6.18 (s, 1H, Ar-H, H<sub>3</sub>), 6.47-6.63 (m, 4H, Ar-H,

H<sub>5</sub>, H<sub>6</sub>, 4H), 7.58-8.51 (OH, broad peak, H<sub>1</sub>, 3H), ppm. <sup>13</sup>C NMR (75 MHz, DMSO-d<sub>6</sub>) δ ppm: 55.26, 59.35, 102.38, 106.69, 113.19, 121.22, 129.91, 138.19, 152.84, 156.96.

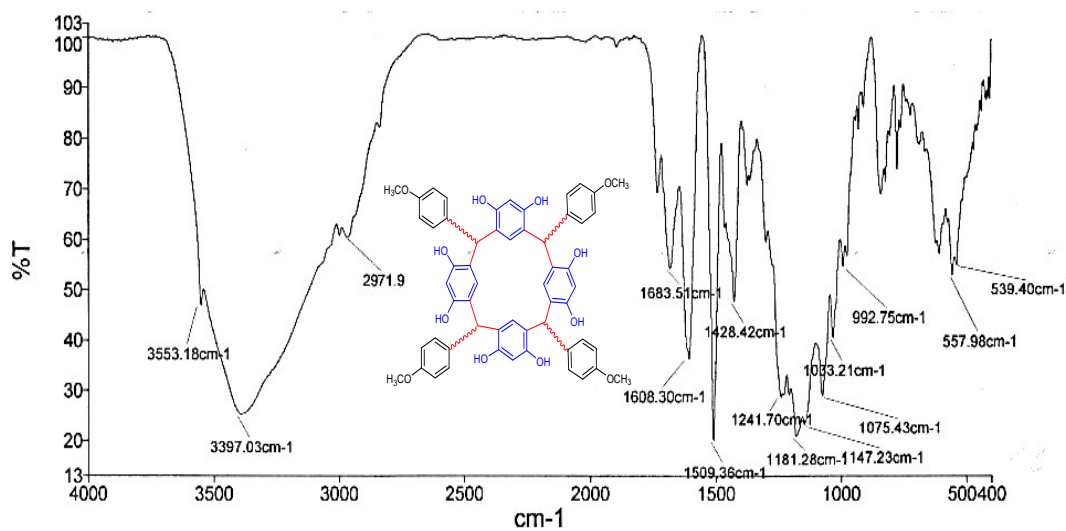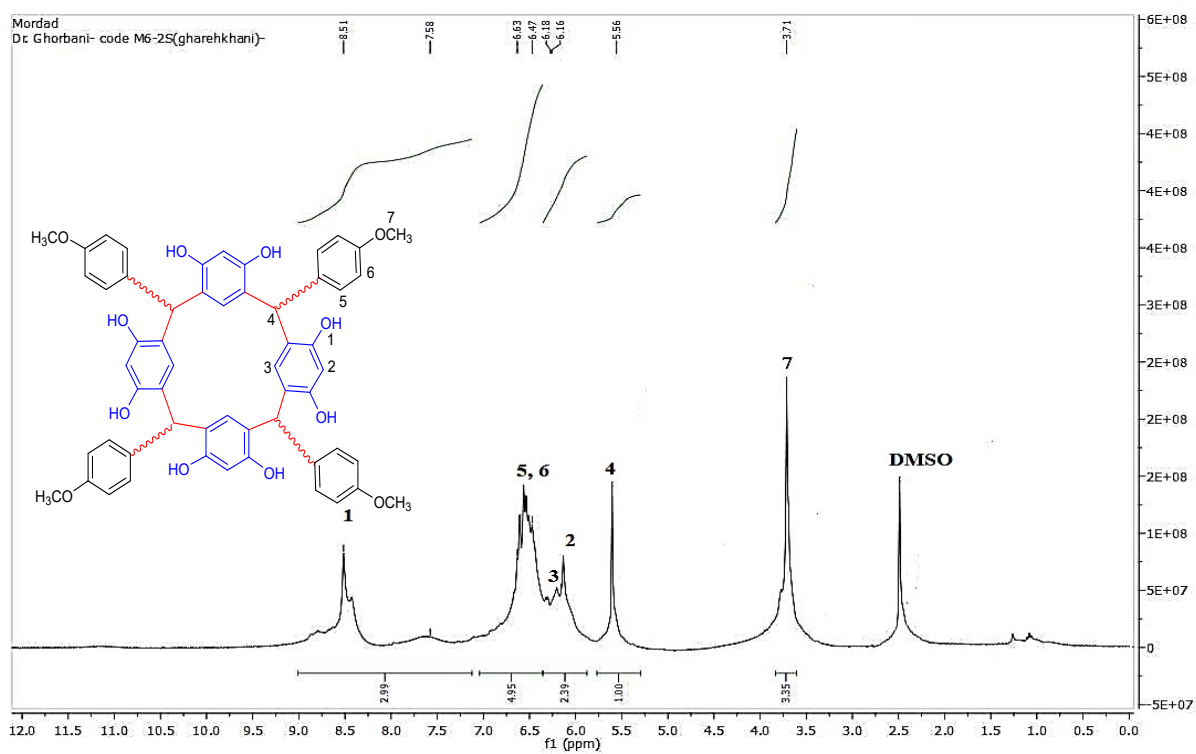

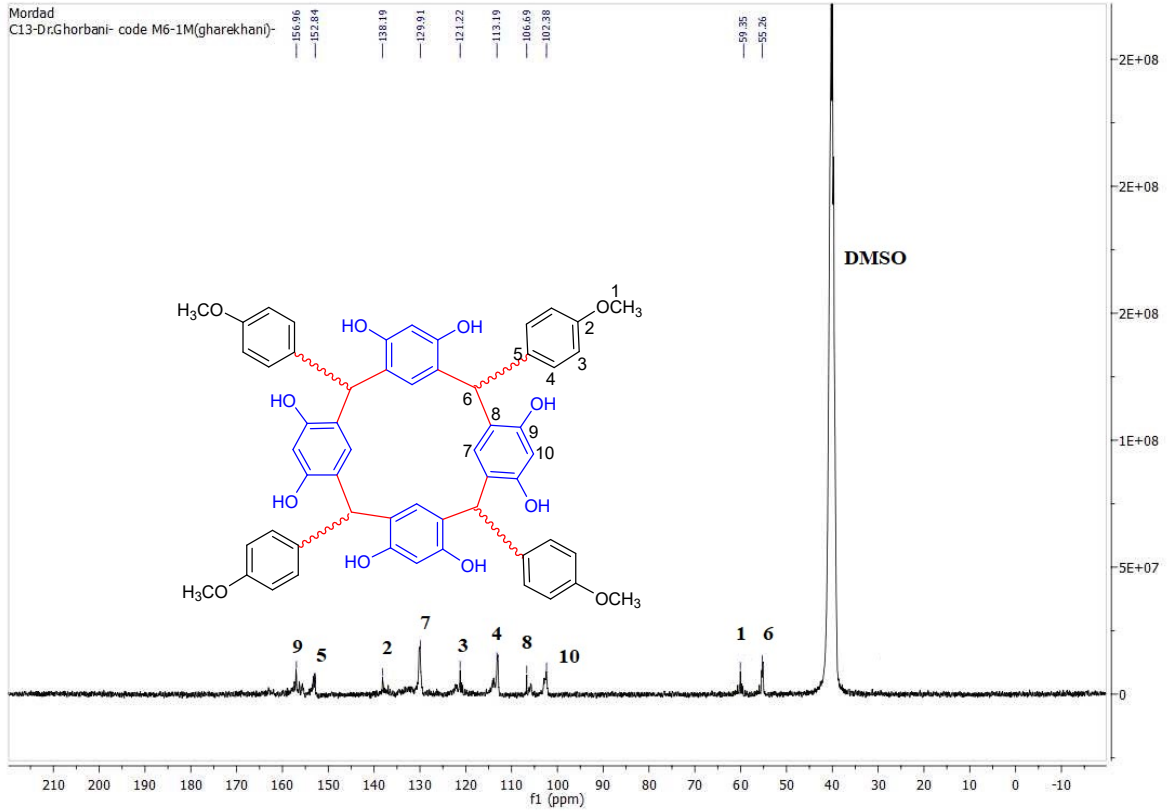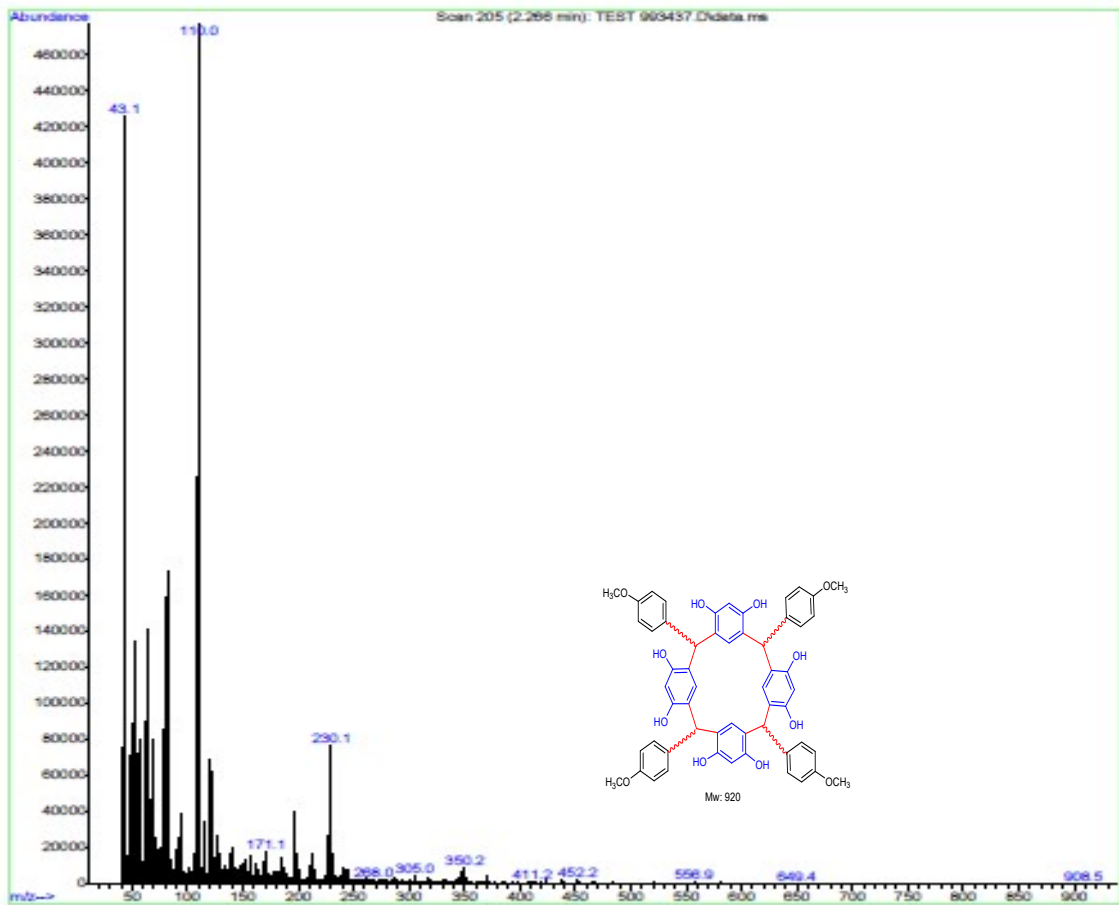



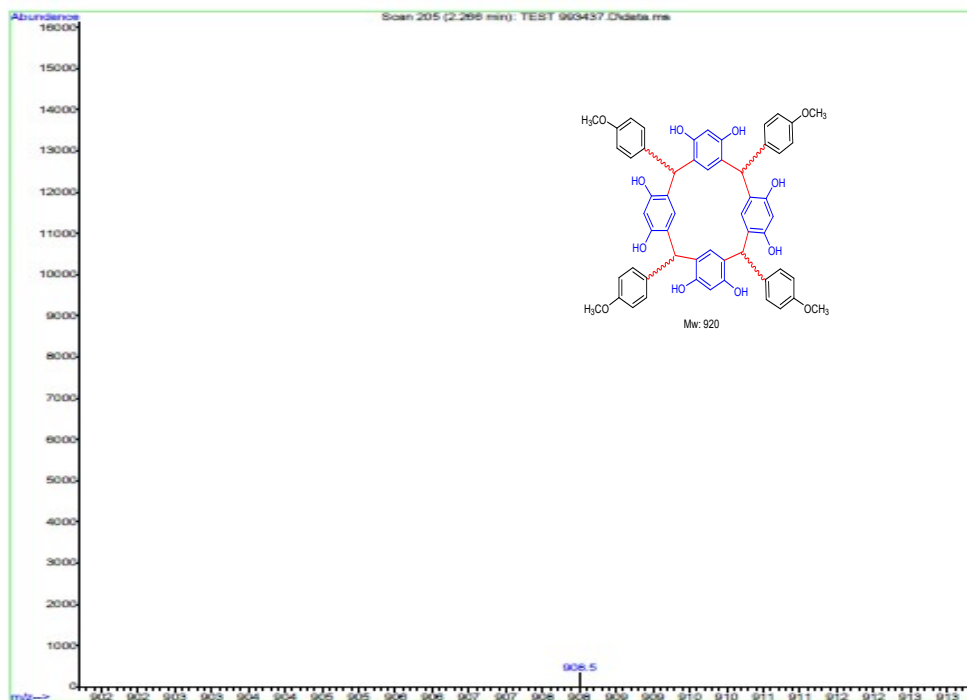

**2,8,14,20-Tetra-p-N,N-dimethylphenyl-4,6,10,12,16,18,22,24-octahydroxycalix[4]-resorcarene (3d)**

Yellow solid, mp: 228-230 °C; FT-IR (KBr)  $\nu$ : 3268, 3161, 3004  $\text{cm}^{-1}$ ;  $^1\text{H}$  NMR (300 MHz,  $\text{DMSO-}d_6$ )  $\delta$  ppm: 3.02 (s, 7H,  $\text{N}(\text{CH}_3)_2$ ,  $\text{H}_7$ ), 5.76 (s, 1H, CH,  $\text{H}_4$ ), 6.12 (s, 1H, Ar-H,  $\text{H}_2$ ), 6.21 (s, 1H, Ar-H,  $\text{H}_3$ ), 6.28-7.16 (m, 4H, Ar-H,  $\text{H}_5$ ,  $\text{H}_6$ , 4H), 9.89 (OH, broad peak,  $\text{H}_1$ , 4H), ppm.  $^{13}\text{C}$  NMR (75 MHz,  $\text{DMSO-}d_6$ )  $\delta$  ppm: 43.66, 56.77, 102.65, 105.89, 111.36, 117.31, 121.84, 130.47, 155.80, 156.98.

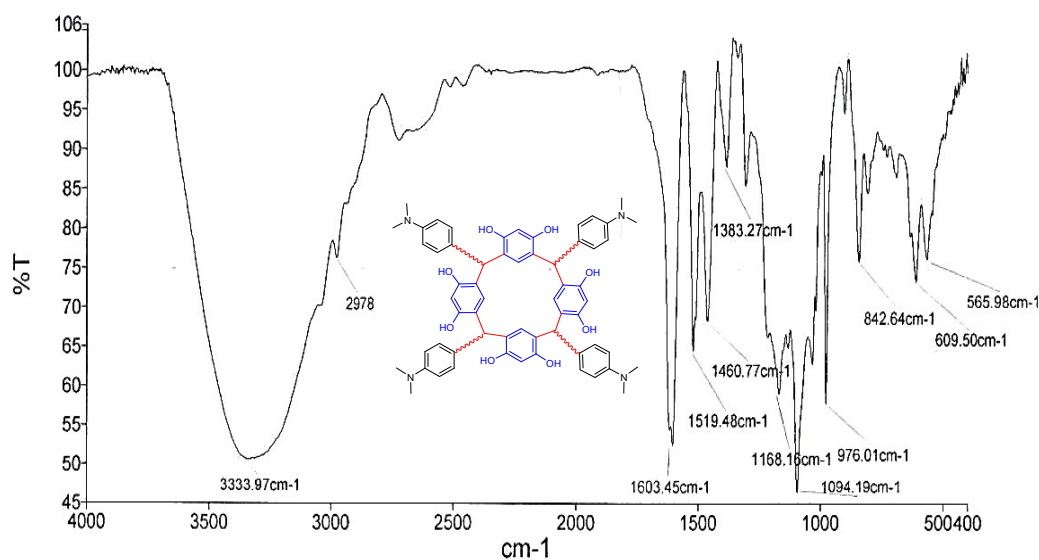

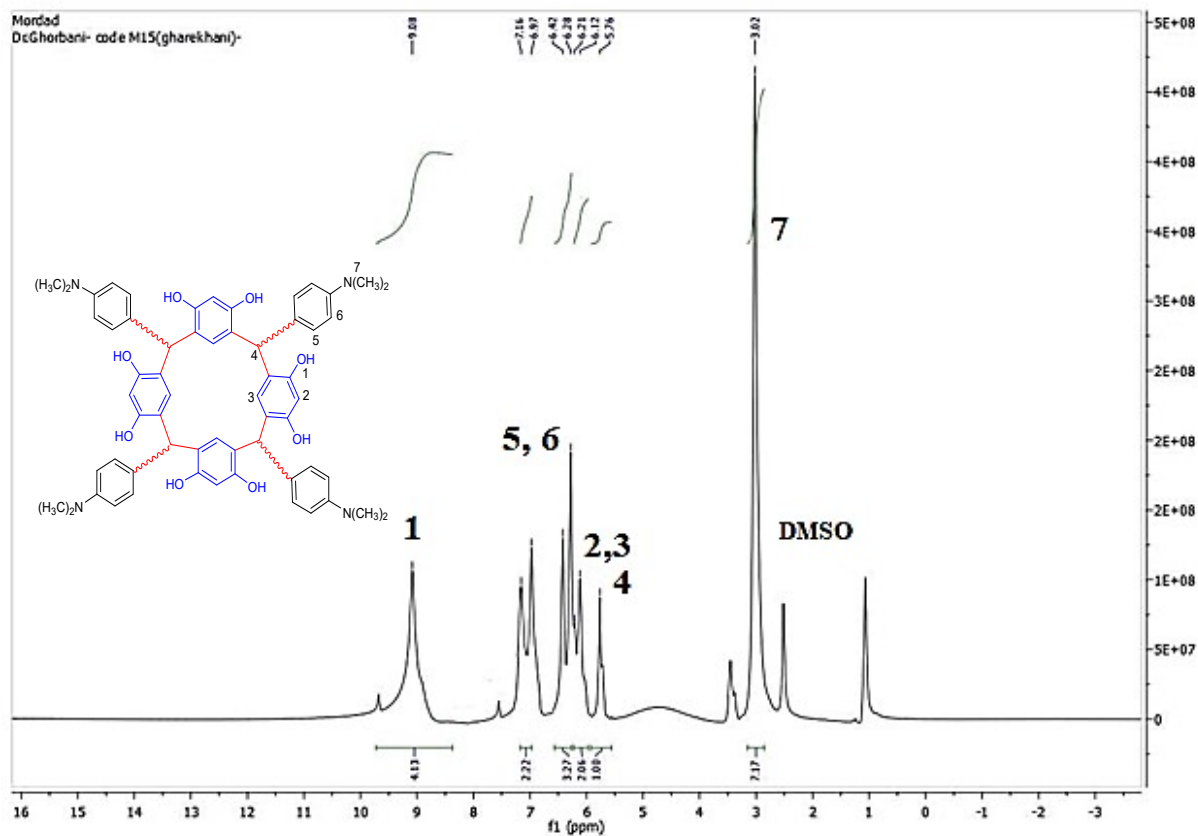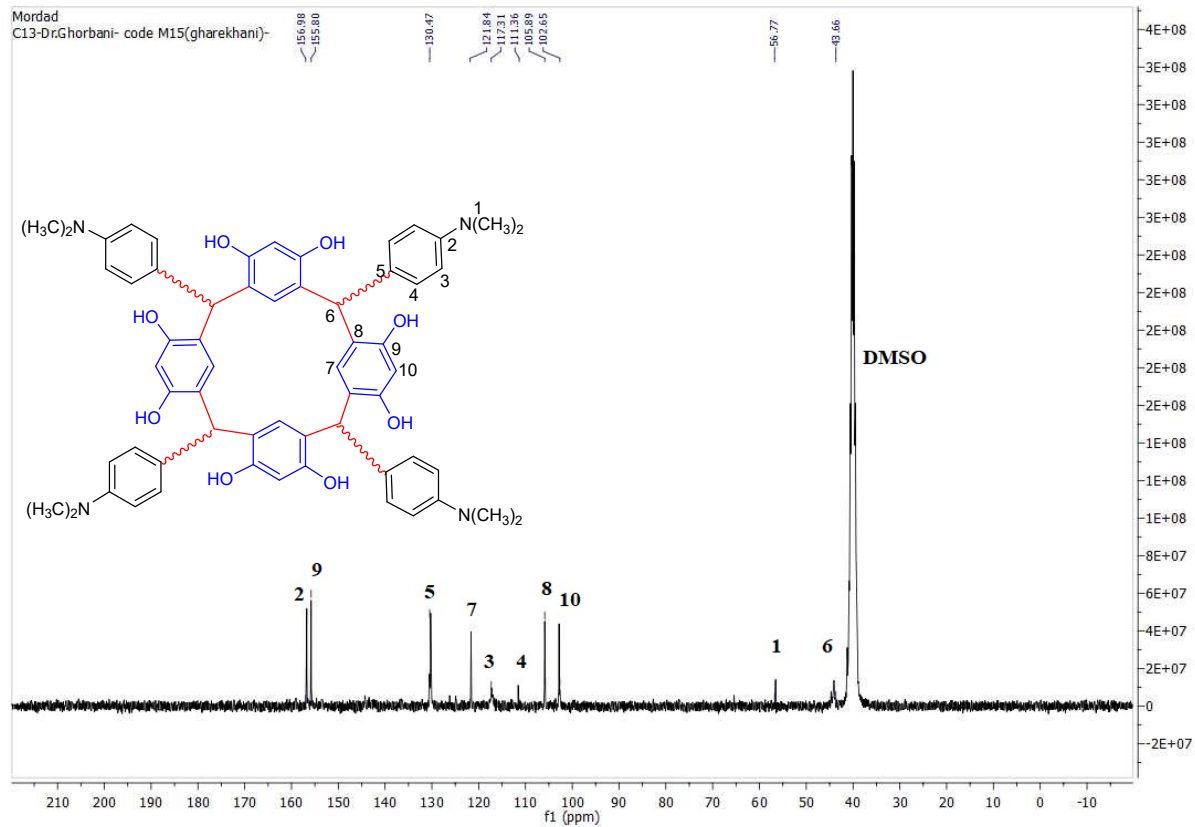

**2,8,14,20-Tetra-*m*-methoxyphenyl-4,6,10,12,16,18,22,24-octahydroxycalix[4]-resorcarene (3e)**

Red solid, mp: 298-300 °C; FT-IR (KBr)  $\nu$ : 3403, 3059, 2926  $\text{cm}^{-1}$ ;  $^1\text{H NMR}$  (500 MHz,  $\text{DMSO-}d_6$ )  $\delta$  ppm: 3.58 (s, 3H,  $\text{OCH}_3$ ,  $\text{H}_9$ ), 5.50 (s, 1H, CH,  $\text{H}_4$ ), 6.16 (s, 1H, Ar-H,  $\text{H}_2$ ), 6.18 (s, 1H, Ar-H,  $\text{H}_3$ ), 6.50-7.70 (m, 3H, Ar-H,  $\text{H}_5$ ,  $\text{H}_6$ ,  $\text{H}_7$ ,  $\text{H}_8$ , 4H), 8.58-9.5 (OH, broad peak,  $\text{H}_1$ , 3H), ppm.  $^{13}\text{C NMR}$  (125 MHz,  $\text{DMSO-}d_6$ )  $\delta$  ppm: 54.95, 58.90, 102.39, 106.98, 110.77, 113.92, 121.66, 128.63, 147.67, 152.79, 158.90.

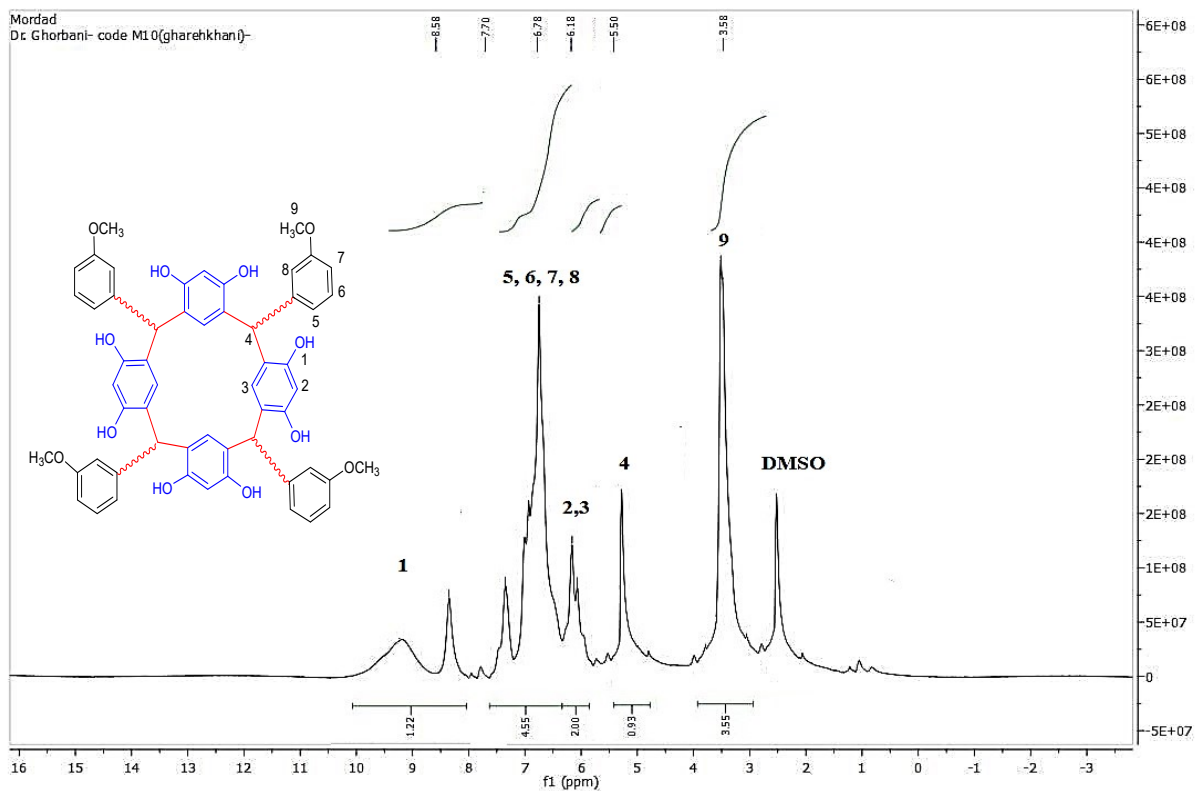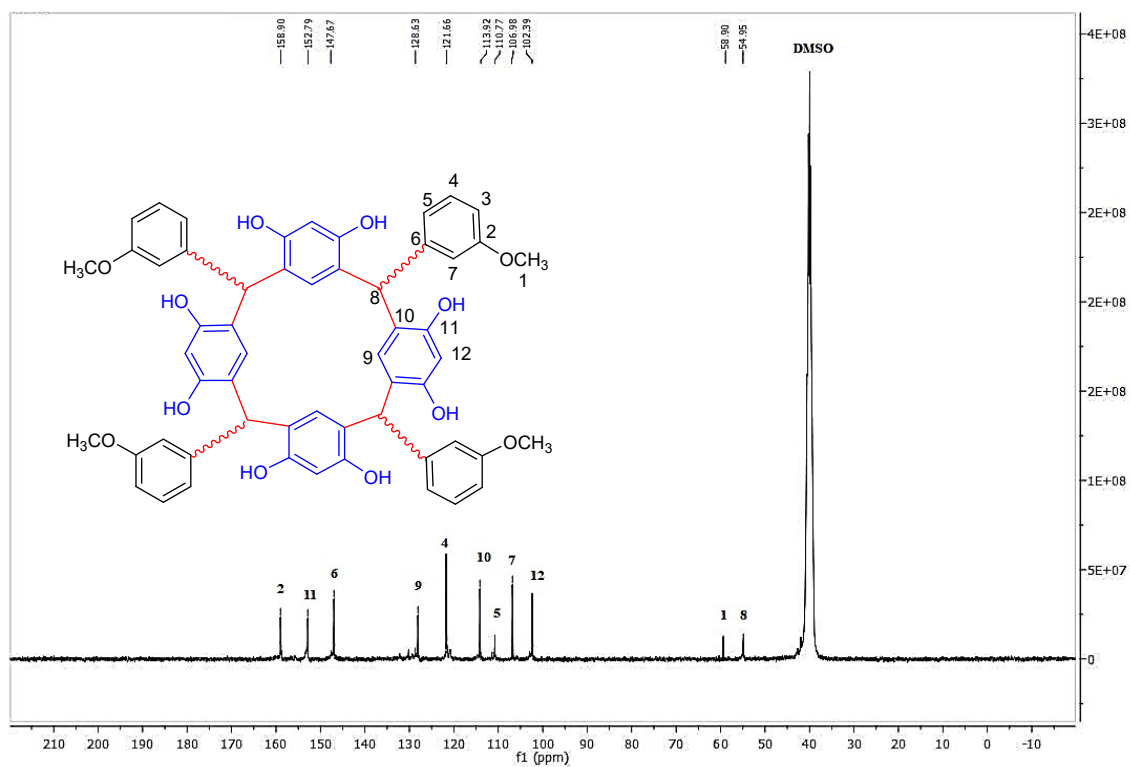

**2,8,14,20-Tetra-*p*-fluorophenyl-4,6,10,12,16,18,22,24-octahydroxycalix[4]-resorcarene (3e)**

Yellow solid, mp: 223-225 °C; FT-IR (KBr)  $\nu$ : 3268, 3061, 3004  $\text{cm}^{-1}$ ;  $^1\text{H}$  NMR (500 MHz,  $\text{DMSO-}d_6$ )  $\delta$  ppm: 5.63 (s, 1H, CH, H<sub>3</sub>), 6.17 (s, 1H, Ar-H, H<sub>5</sub>), 6.18 (s, 1H, Ar-H, H<sub>4</sub>), 6.63-6.80 (m, 4H, Ar-H, H<sub>1</sub>, H<sub>2</sub>, 4H), 8.65-9.05 (OH, broad peak, H<sub>6</sub>, 4H), ppm.  $^{13}\text{C}$  NMR (125 MHz,  $\text{DMSO-}d_6$ )  $\delta$  ppm: 62.98, 102.78, 106.80, 114.36, 121.85, 130.20, 142.25, 158.96. MS:  $m/z$  = 864 [M<sup>+</sup>].

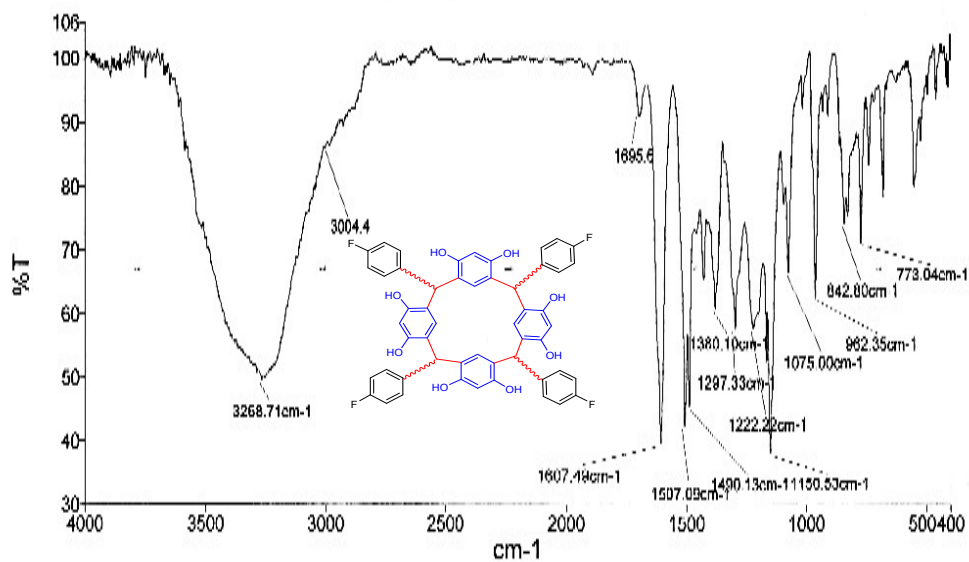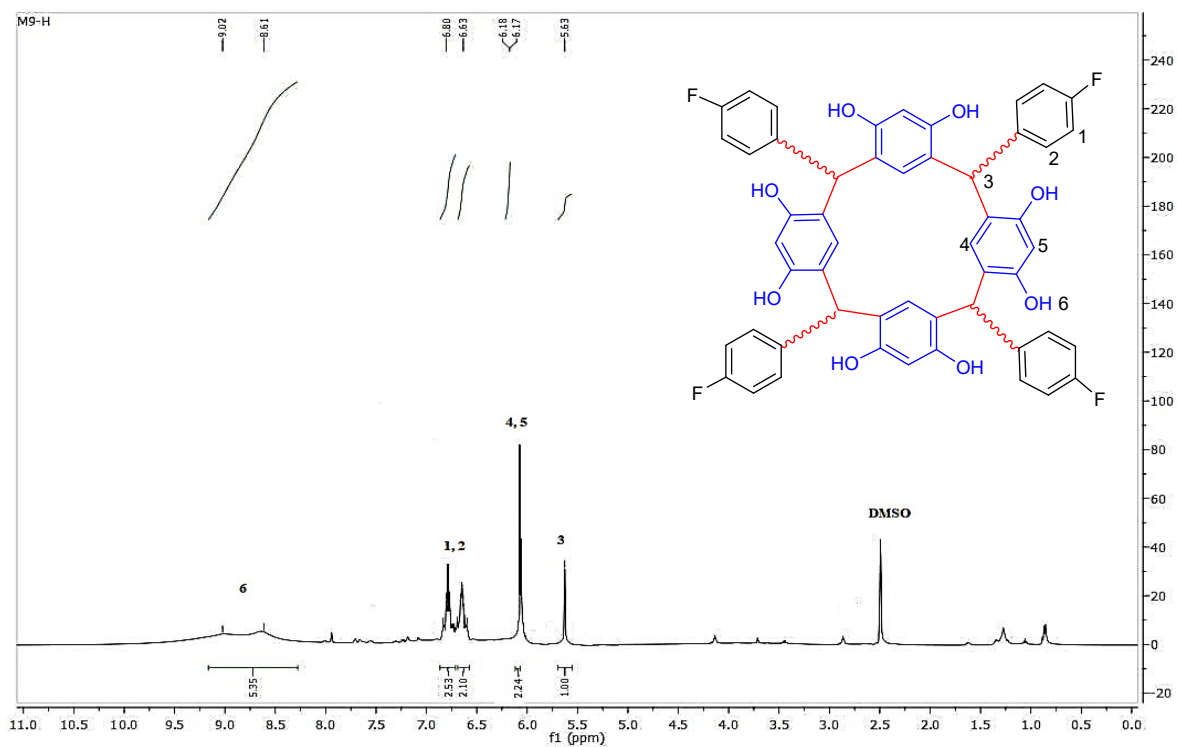

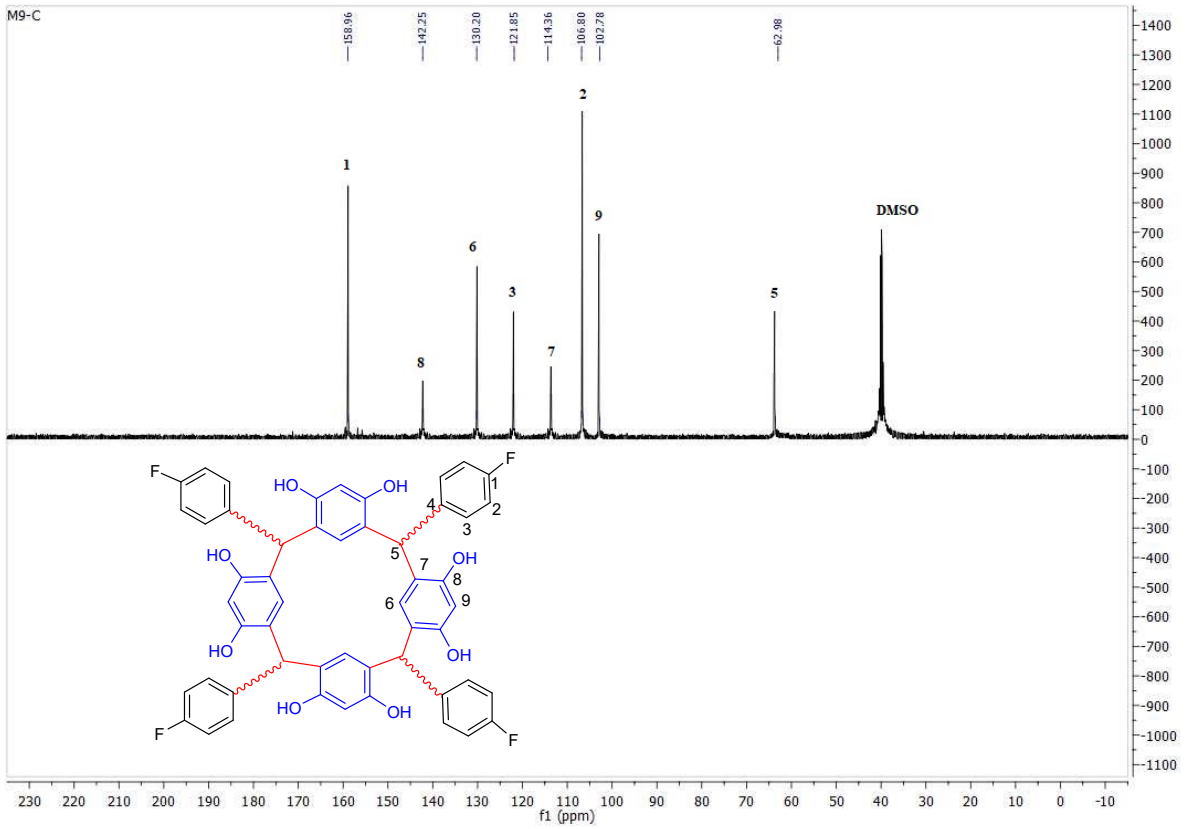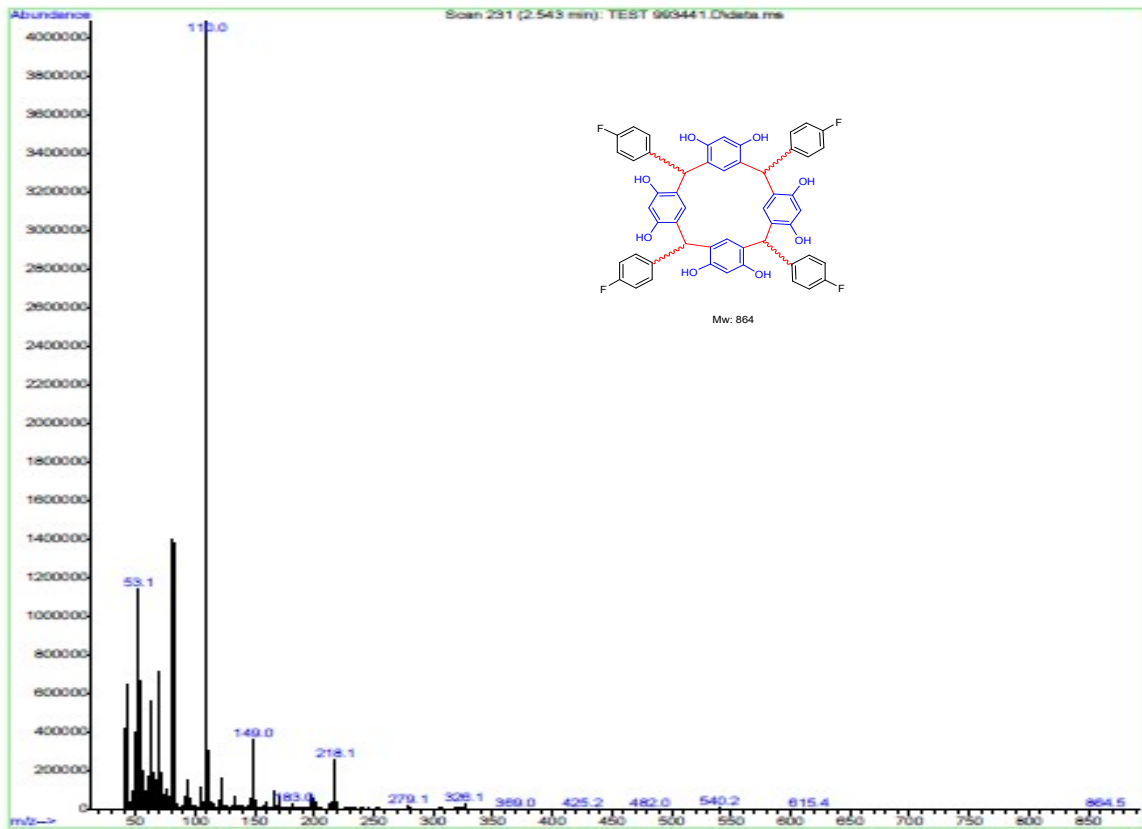



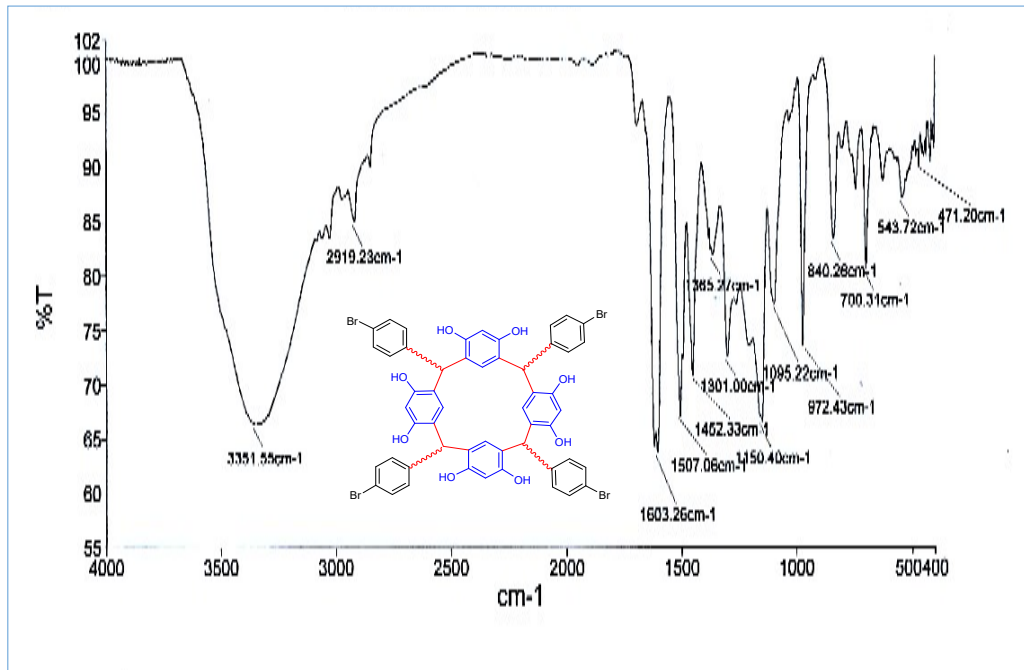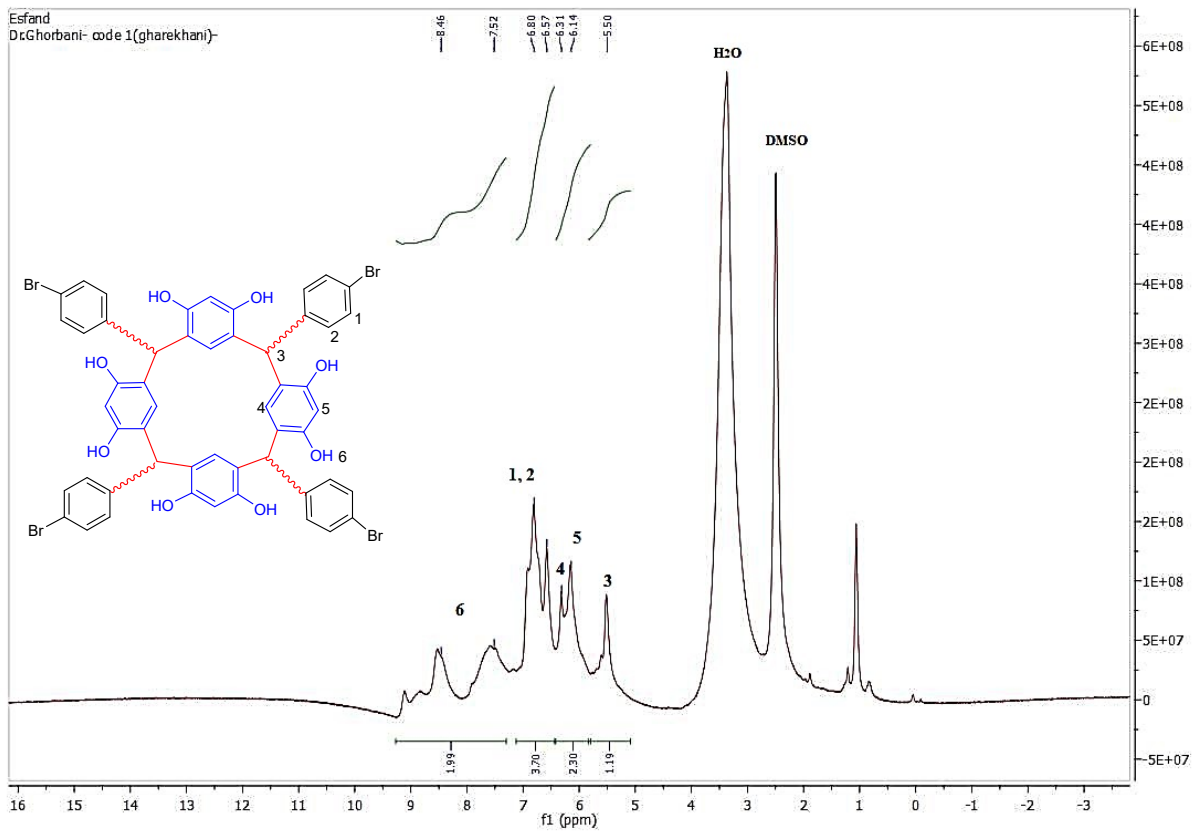

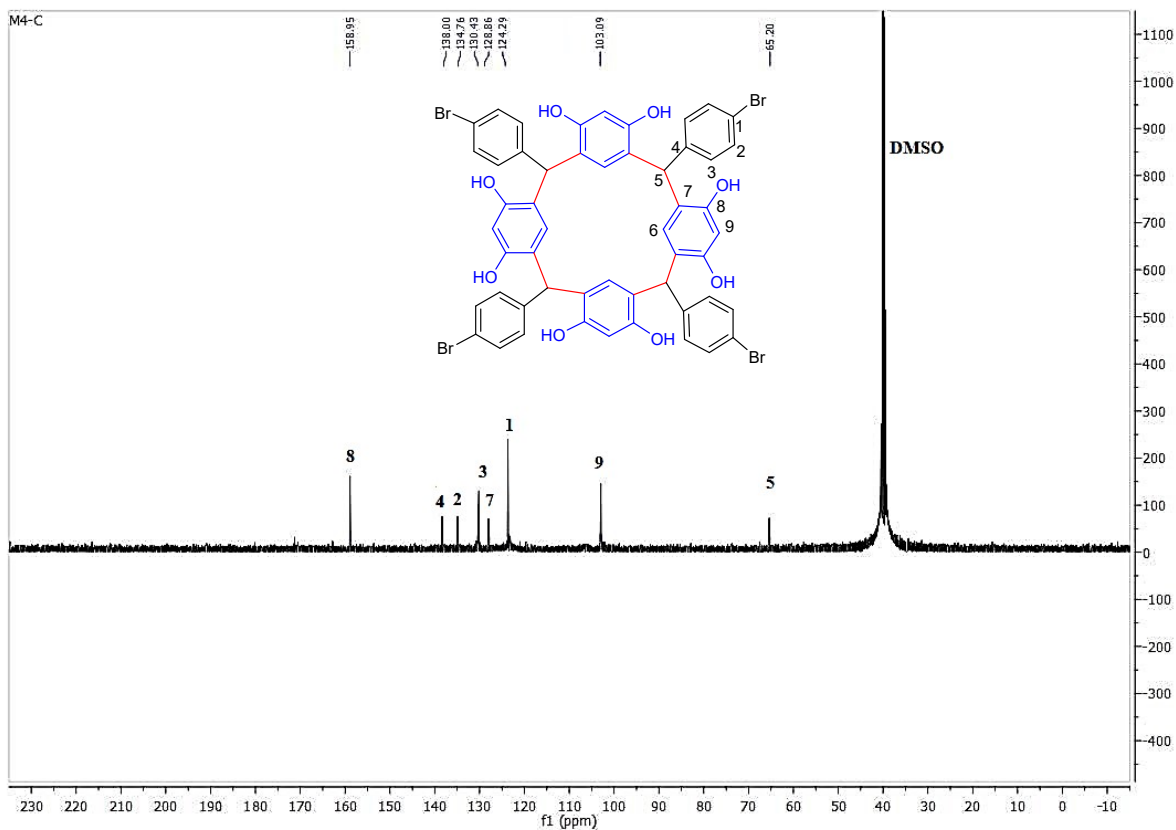

**2,8,14,20-Tetra-*p*-chlorophenyl-4,6,10,12,16,18,22,24-octahydroxycalix[4]-resorcarene (3g)**

Reddish orange solid, mp: 286-288 °C; FT-IR (KBr)  $\nu$ : 3389, 1520, 1148  $\text{cm}^{-1}$ ;  $^1\text{H}$  NMR (300 MHz, DMSO-*d*<sub>6</sub>)  $\delta$  ppm: 5.60 (s, 1H, CH, H<sub>3</sub>), 6.20 (s, 1H, Ar-H, H<sub>4</sub>), 6.33 (s, 1H, Ar-H, H<sub>5</sub>), 6.60 (broad peak, 2H, Ar-H, H<sub>1</sub>), 6.69 (broad peak, 2H, Ar-H, H<sub>2</sub>), 7.73-8.83 (OH, broad peak, H<sub>6</sub>, 3H), ppm.  $^{13}\text{C}$  NMR (75 MHz, DMSO-*d*<sub>6</sub>)  $\delta$  ppm: 62.96, 111.87, 120.13, 127.05, 127.54, 130.66, 134.00, 145.31, 153.28.

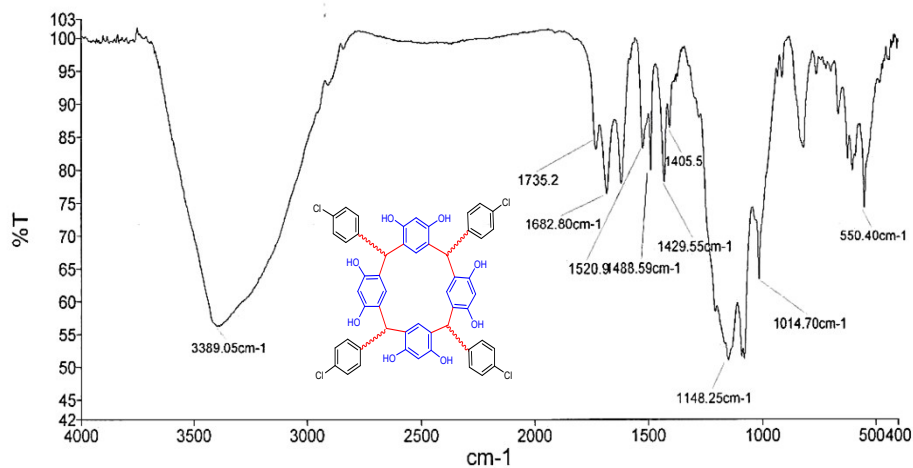



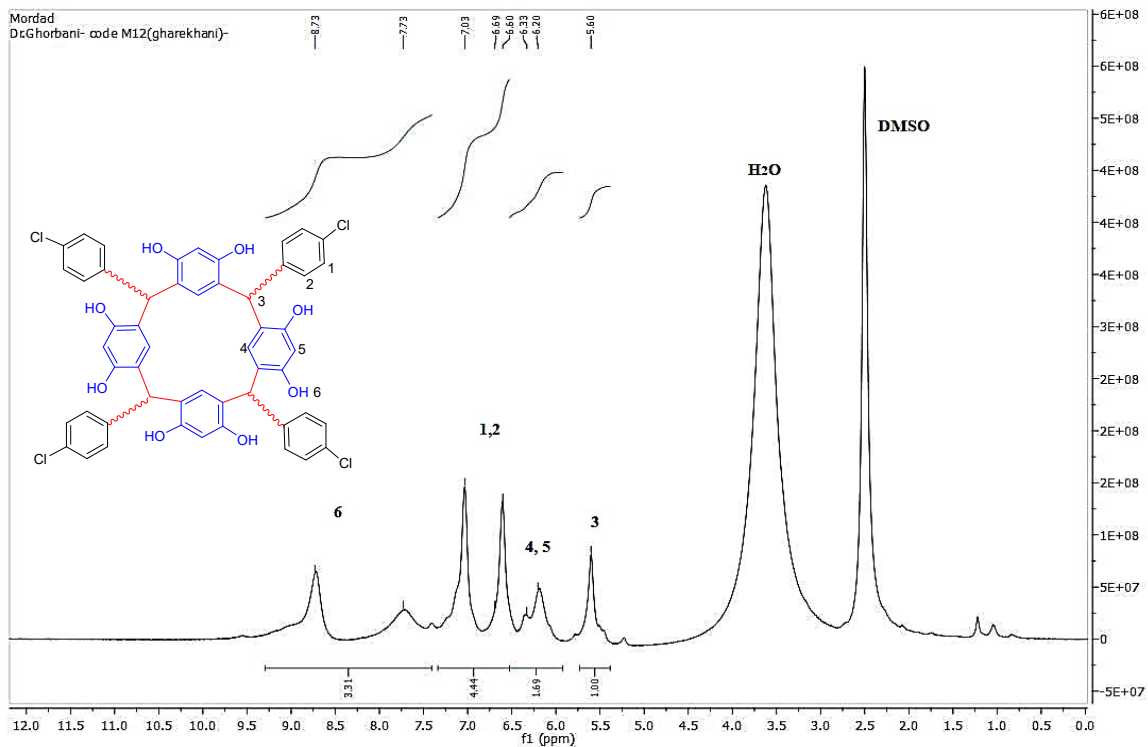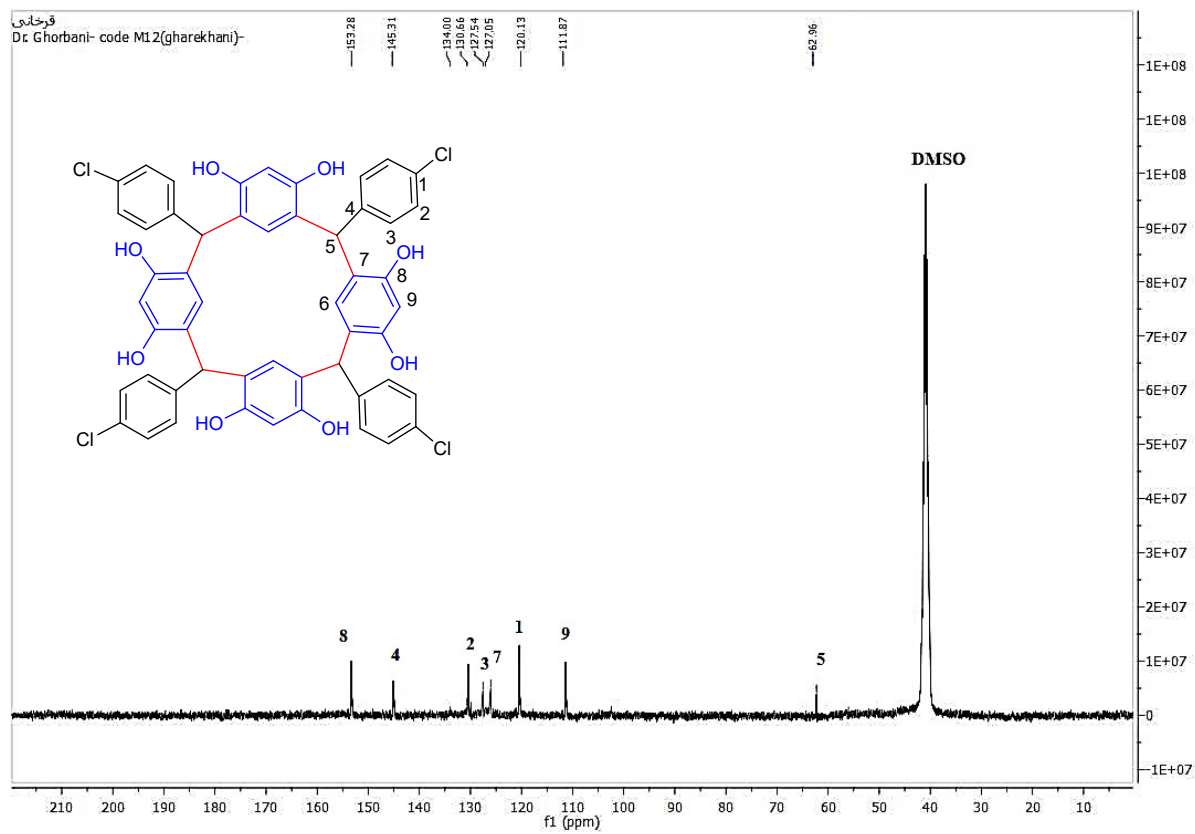

**2,8,14,20-Isobutyl-4,6,10,12,16,18,22,24-octahydroxycalix[4]-resorcarene (3h)**

Orange solid, mp: 286-288 °C; FT-IR (KBr)  $\nu$ : 3258, 2955, 2906  $\text{cm}^{-1}$ ;  $^1\text{H}$  NMR (500 MHz,  $\text{DMSO-d}_6$ )  $\delta$  ppm: 0.83 (s, 3H,  $\text{CH}_3$ ,  $\text{H}_5$ ), 0.84 (s, 3H,  $\text{CH}_3$ ,  $\text{H}_8$ ), 1.37 (m, 1H,  $\text{H}_6$ ), 1.67 (m, 2H,  $\text{H}_7$ ), 6.14 (s, 1H, Ar-H,  $\text{H}_4$ , 10 Hz), 6.19-6.21 (m, 2H, Ar-H,  $\text{H}_1, \text{H}_3$ ), 8.91 (OH, broad peak,  $\text{H}_1, 3\text{H}$ ), ppm.  $^{13}\text{C}$  NMR (125 MHz,  $\text{DMSO-d}_6$ )  $\delta$  ppm: 15.48, 23.28, 26.19, 32.90, 44.47, 103.09, 122.94, 130.18, 159.19. MS:  $m/z = 712$  [M+].

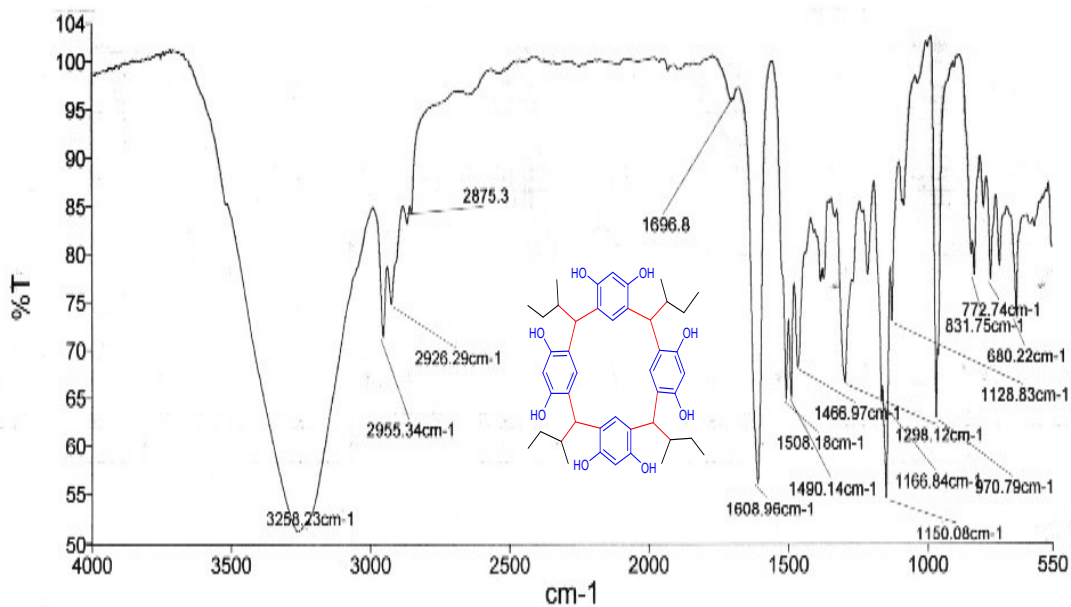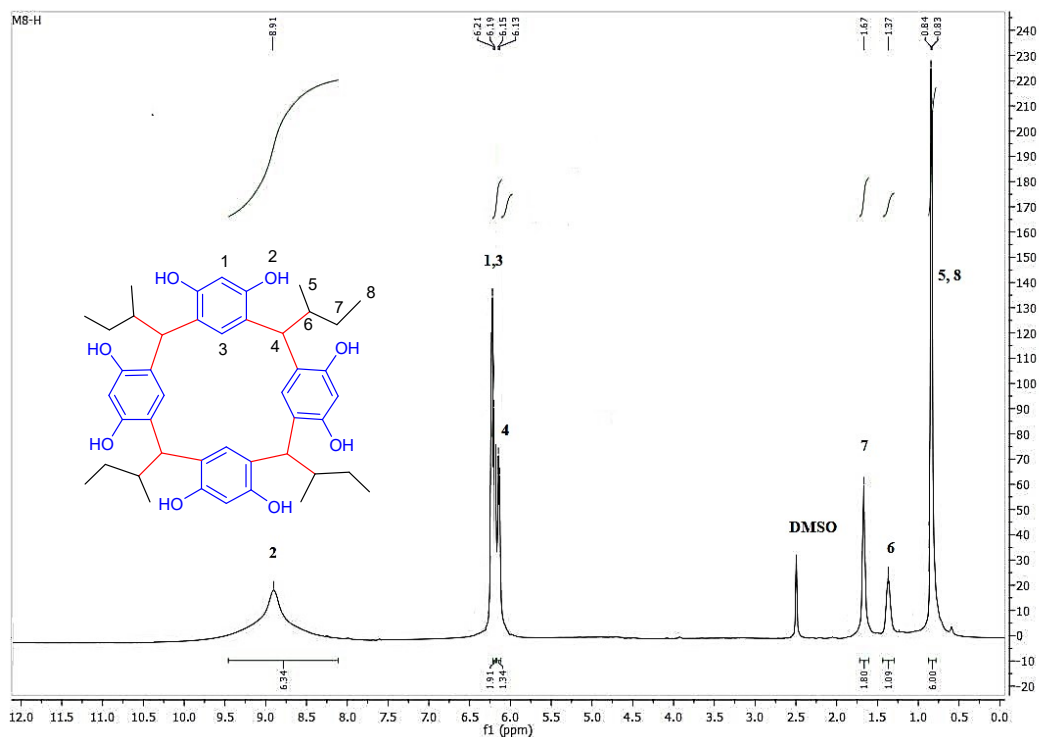

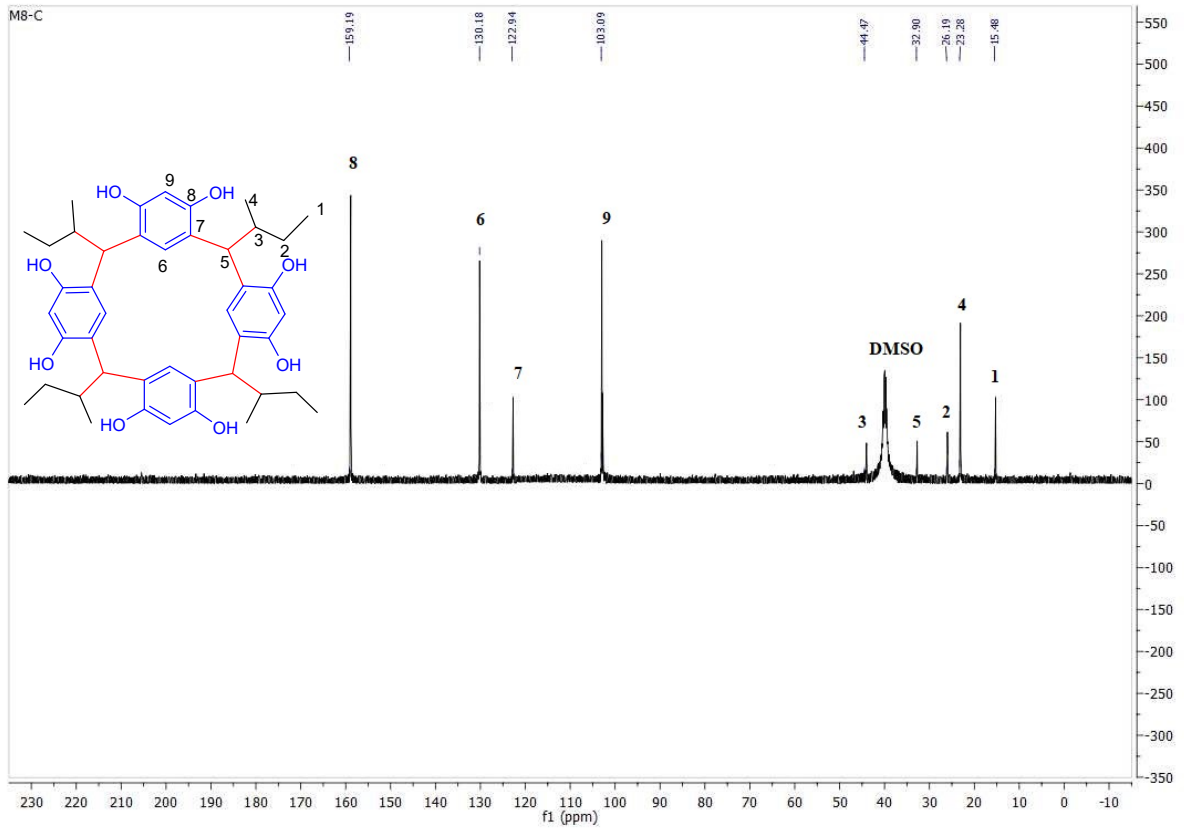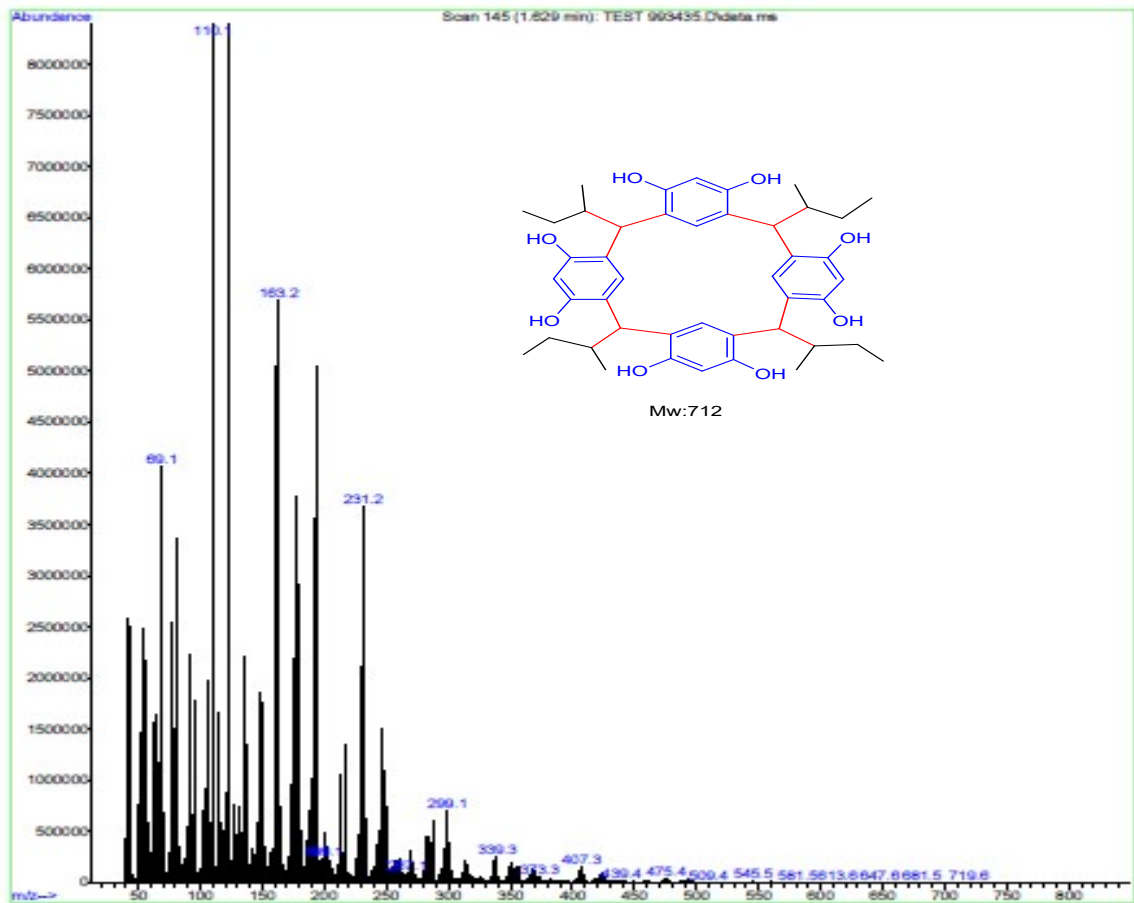

Supplement: d1ra07393a1.pdf [file d1ra07393a1.pdf]
